# Supplementary material
Source: PubMed Central journal article supplement (PMC1363771)

## SUPPORTING DATA

### TFAM DETECTS CO-EVOLUTION OF tRNA IDENTITY RULES AFTER LATERAL TRANSFER OF HISTIDYL-TRNA SYNTHETASE

By David Ardell and Siv Andersson

**Supplementary Methods:** Construction of MSDB and cross-validation comparison of TFAM to other methods.

**Supplementary Dataset 1:** Alignment of data used to make Figure 4 in PHYLIP format.

**Supplementary Figure 1:** BIONJ tree of recent genomically annotated HisRS and HisRS-like sequences for the phylogenomic analysis used to make Figure 4.

**Supplementary Figure 2:** Maximum likelihood tree of 251 sequences combining PSI-Blast queried with *Agrobacterium tumefaciens* HisRS with genomic HisRS sequences. The figure is meant to be examined electronically as a PDF file. PROTML RELL values are shown at nodes, and GenBank gi numbers are shown at the end of the description lines.

**Supplemental Methods.** Creation of Modified Sprinzl Database. The 1999 version of the Sprinzl database (820 sequences) was back-translated into DNA sequences using a Perl script called SPRINZL2FAS accounting for posttranscriptional modification codes and then compressed into 663 unique sequences. Of these 663, the 5 sel-cys tRNAs were removed and three Ala tRNAs that lack the G3-U70 base-pair which is extremely important for Ala identity (cite Martinis and Schimmel). All other Ala tDNAs had a G3-U70 pair. The exceptional removed Alas were RA1540 from *Bacillus subtilis*, ref. (H.ISHIKURA, K.MURAO, Y.YAMADA, EMBO-FEBS MEETING, STRASBOURG, JULY 1980). A search of *Bacillus subtilis* tRNAs from the genome (tRNAscan-SE) does not indicate any tRNAs with this sequence. The discrepancy could come from a sequencing error in the tRNA, in the genome (less likely) or a strange mutant. Similarly lacking the G-U pair against genome evidence were RA1661 (R.J.WILLIAMS, W.NAGEL, B.ROE, B.DUDOCK (1974) BIOCHEM. BIOPHYS. RES. COMM. 60, 1215-1221) from *E. coli*, and DA1730 (A.WILMOTTE, J.NEEFS, R.DEWACHTER (1994) MICROBIOLOGY 140, 2159-2164) from TRICHODESMIUM SP

The remaining 655 tDNAs were split into pregenomic (415 tDNAs) and postgenomic (240 tDNAs) datasets. Sprinzl annotations in the pregenomic dataset were screened in three ways: 1) internal consistency by exact sequence matching, 2) tRNAscan-SE-based anticodon identification, 3) internal consistency by profile-scoring with TFAM. Using criteria 1 and 2, 1 back-translated tDNA was a duplicate of another tDNA in the pre-genomic set with conflicting identity annotations. Using tRNAscan-SE to identify anticodons and disambiguate the identities, DC1230 and DK1230 were assigned Lys identity. TRNAscan-SE found two more incorrect annotations: DI1821 with an ala anticodon and DE1201 with a phe anticodon. TFAM was then used, with this corrected pregenomic dataset as both training and test data, which confirmed these annotation changes, indicating that these sequences have typical bacterial identity elements as well as anticodons. In addition, TFAM suggested these additional changes, which were inspected, and changed or not changed for the following reasons: RM1580 as an initiator (identical in

sequence to RX1581, confirmed with TFAM as an initiator, has bacterial conserved C1:A72 basepair for initiator identity); DM1231 as an initiator (initiator by TFAM, has conserved C1:A72 basepair); DM1660 = DM1750 = RM1660 (“=” indicates “identical in sequence to”, annotated as Ile by TFAM, left as Met because of RNA evidence in SprinzlDB); DN1230 (Thr identity in TFAM, but confirmed AIn anticodon by tRNAscan-SE); DV1230, DV1480, DV1540 = RV1540, DV1720 and DV1570 (Ala by TFAM, but lacks G3-U70 basepair, so left as Val), DV1661 = RV1660 and DV1662 = RV1661 (Ile in TFAM, left as Val because of RNA evidence). After these changes, a resubstitution analysis with TFAM converged (results were the same as the last round).

The postgenomic data was then analyzed with tRNAscan-SE (prokaryotic tRNA covariance model), with TFAM using the converged pregenomic annotation training data, and with BLAST. To use BLAST, the pregenomic data was made into a database with **formatdb**. Postgenomic data was BLASTed against this database with **blastall** and parameters to increase sensitivity (**-q -1 -r 1 -W 7 -G 2 -E 1**). The results of this analysis were compared with the output of TFAM and tRNAscan-SE. In the cases in which the results of all three analyses did not agree, the tRNAscan-SE annotation was preferred except when the tRNA in question had a CAU (Met) or UCA (STOP) anticodon or was annotated as a Pseudo-tRNA by tRNAscan-SE, in which case the BLAST annotation was preferred.

### Supplementary Table 2

|              | Accuracy        |
|--------------|-----------------|
| HMMer Local  | (638/655) 97.4% |
| HMMer Global | (637/655) 97.3% |
| TFAM         | (636/655) 97.1% |
| COVE         | (636/655) 97.1% |
| Infernal     | (623/655) 95.1% |

Results of “leave-one-out” cross-validation analysis comparing the ability of different methods to recover the annotations assigned in the Modified Sprinzl Database (“Accuracy”) generated as

described in the preceding section.

### **Parameters for analysis:**

HMMer Local: Separate HMM models were made for each identity class and each leave one-out-dataset. Models were built using **hmmbuild -s -nucleic** from training data separately prealigned with **covea** and the TRNA2-prok.cm covariance model (Lowe and Eddy, 1996). Data scored against all models using **hmmsearch -A0**. The model with highest score was taken to be the annotation.

HMMer Global: Separate HMM models were made for each identity class and each leave one-out-dataset. Models were built using **hmmbuild -g -nucleic** from training data separately prealigned with **covea** and the TRNA2-prok.cm covariance model (Lowe and Eddy, 1996). Data scored against all models using **hmmsearch -A0**. The model with highest score was taken to be the annotation.

TFAM: Coveam models were made for each leave-one-out dataset as in the text, and ran with **tfam -m**

COVE: Separate covariance models were made for each identity class and each leave one-out-dataset. Models were built using **coveb** from training data separately prealigned with **covea** and the TRNA2-prok.cm covariance model (Lowe and Eddy, 1996). Data scored against all models using **coves**.

Infernal: Separate covariance models were made for each identity class and each leave one-out-dataset. Models were built using **cmbuild** from training data separately prealigned with **covea** and the TRNA2-prok.cm covariance model (Lowe and Eddy, 1996). Data scored against all models using **cmscore**.

**Results:** The TFAM methodology performs as well as COVE but is faster, because of the incorporation on COVEMF into TFAM. TFAM performs

better than Infernal and slightly less well than HMMer. The advantage of TFAM over HMMer is that TFAM outputs alignments of all data tRNAs to a models that are themselves mutually aligned. This can then be used to analyze tRNA identity determinants such as in the accompanying article (Freyhult et al.)

```

77 437
15612180 ITPKVLSGFK DRLPKDAIQK AQLLAKVSVV FQSFQFVPIE TPHLEYAQL LPDASS---D
34483510 ITPRTLSGFK DRLPQEMAK SRLLRVTSEV FEGFGFVPIE TPHELYAEIL VKQGD5---E
34397963 QKPS1PKGMR DFPVEMSRK NYIFDITREV YELFGFNQIE TPTMEMSLT MKGYGE---E
29347250 AKPS1PKGTR DFPVEMAKR NYIFDITREV YHLYGQQIE TPTMEMSLT MKGYGD---E
23137435 EKPS1PKGTR DFGPAQMLKR QYLLQITREI FTKYGFPIE TPAMENSLV TKGYGD---E
Bhae-RS TKARLPRGFV DRTSAQLYAI EVMIAQIRQV YELYGFEALE TPIFEYTDVL --GKFLP---D
Bana-RS TKARLPRGFV DRTSAQLYAI ETMIAQIREV YELYGFEALE TPIFEYTDVL --GKFLP---D
Atsh-RS LKARLPRGFV DRSAADIHAT NEMWDKIRRV YELYGFDPIE TPLFEYTDAL --GKFLP---D
Smti-RS LRARLPRGFV DRSAADIRAV DEMIAKIREV YERYGFDPIE TPLFEYTDAL --GKFLP---D
Bs30-RS MKARLPRGFV DRVPDDLRAA EKMMATIREV YDLYGFEPVE TPLVEYTDAL --GKFLP---D
Mlti-RS TKARLPRGFA DRSAEDIRAV EKMMATIRSV YELYGFEPAD QPLIEYTDAL --GKFLP---D
Bjum-RS LKARLPRGLE DRDPAAIRAT REMVEKIRAV YELYGFEPVE TPAMEYTDAL --GKFLP---D
Apix_1 GRPRPPRGFR DFPPEVMILR KRLLSRLREV FESYGFDPLO TPAVEYWETL SGKYGEE---A
Bmis_2 MKARLPRGFV DRVPDDLRAA EKMMATIREV YDLYGFEPVE TPLVEYTDAL GKFLPDQ-DR
Rp09_1 LRARLPRGLA DRGPAEIAAT RAMVEKIREV YERYGFEPVE TPAFEYTDAL GKFLPDQ-DR
SpS3_1_3 PKAETPKGFR DYFGAETVQR TEMLRDIAGV YHRYGFEALE SSVAVETVEAL GKFLPDVD-R
GoH1_1 SGLQPPRGTH DLIGETMRRH HHVVTARRV LRTYGFEEWS TPFIETDRVF SRTLGETSDV
ZmM4 -----TGR NSGFRITAVF ARSLGETTDV
Weer_1 MTNQTVRGTK DLLDFEWYKF KYIEQTANRI SLYGFLPAQ TPICEFTEVF TKTLGDS5DI
WeRS_1 MTNQTVRGTK DLLDFEWYRF KYIQIANTRI SLYGFLPAQ TPICEFTEVF MTKLGD5SDI
Erel_1 NKLREVRGTK DLLDDELRYF QYIQLHAQTI ASRYGFIPOV TPIIEFTEVF TKLGNTS-DI
Ames_1 GKLPVGRGTR DLLPEECYKF WHIRDVAHDI GERYGFVPIE TPIFEQDQVF LKTLGDS5DI
Ccus-RS PEARAPRGFA DKRARDLRAE RAILLAESAV YERYGFEALD TGAFAYADAL --GKFLP---D
14600873 GRPRPPRGFR DFPPEVMILR KRLLSRLREV FESYGFDPLO TPAVEYWETL SGKYGEE---A
22972087 APTQNVKGMR DHPADMMMLR QYIWNLTTRI SESHGFEPLQ TPIIEYAEIL EGKLG---D
15838813 IKPRTPPGVL ELLPREQIAF QRMLDVIIRN YERFGFLPVE TPVFELSDVL LTKSGG---E
21231254 IKPRTPPGIM ELLPREQIAF QRMLDVIIRN YERFGFLPVE TPVFELSDVL LTKSGG---E
15895997 IKPSILPGFM ELLPKEQLVF NDIIVSKITGV YEONGFLPMO TPIIEKEEVL LAKSAG---E
28211584 VKPSILPGFM ELLPADQIVF NKMKDITRHN YEKFGFIPLO TPIIEKEEVL LAKSGG---E
17232504 INFSTPSGFP EFLPSEKRLLE LYLLDITRIRV YESYGFPTIE TPAVERLEVL QAK-GN---Q
23464645 AGKASISGFP EWLPSERVVE QRVIDTLRKL FELNGFIEI TRAVETGASL LKK--G---E
23019288 IRPPTISGFP EWTPTIRSVL LRWLDHIRRG FERYGFSVSE TPSVEVLVDL LSK--G---E
32470802 IQPRTLKGRF DYLAAMIPRQ EQLMOTAREV FRSFGFAPID TPTLEHLEIL TKGSGD---E
15639628 VSPVKLKGFR DLLPDEEIER ALLVEKLTVA LRQMGFVPID TPALYEYDEL LTKSEG---D
15594480 MDIKTLKGFK DYLPKDSLIR IHIVRQIFSV LNSYNFDLID TPVLEYSDDL LKKSAG---E
18976636 --MIERVKGTR DFLPEEMVKR RWFVERIRER FETYGFKEVL TPTMEYKFL ELRSGE---E
Meja8406 VMFQKPRGTR DFLPEEMKKR RFVENKLRER FERYGYKEIL TPTFESFELI AKKTGE---E
ArFu8631 MKIERPRGTR DFLPEEMERR REIEKRMRKI AESFGYREVA TPTFYELELF TRKSGE---G
15678272 MDISRPRGTR DFLFAEMRNR KEVEGLRRT FETYGHEIK TPIFEELKLF TVKSGE---E
15231337 IDWNPVKGTR DFPPEDMMLR NMLFNHFKRV SRYGYEEDV PVLETEALF IRKAGE---E
16081268 LQIEKIRGFR DFPYEDMDVE KFIFKTAEEA AEAFFRRID FPSLEYLDLY RIKSGE---E
13540985 MQIERIKGFR DFPYEDMIEI KFIFTEASSV AESYGFRRID FPSLEYLDLY RIKSGE---E
15790871 --MYDRKLGFR DFPYPAEMGPR RAAIDAIEDA AASYGFREVQ TPAMERTEMY VDKSGA---E
24212754 LTTAPYKGRF DFPYEDMMLR NMMFVSMRET VLSFGYEEYD GPILSFDLY KAKSGEE---I
6996014 FVLKTPKGRF DYSPRQMAVR EKVFDVIIRC FKRHGAEVID TPVFEKTEL MKGYGE---D
15029520 FIITKPKGRF DLSPQMVVVR EKILDVIVSC FKRHGAGQMD TPAFELKTEL TKGTE---D
27683037 ISCFKRHGAK GLDTPAFELK EMLTEKYEDN FG--LMDLE DQGGELLSLR YDLTVSFR-R
24643061 FTLKTPKGRF DYGPQQMTRL QGVLDKIVQV FKRHGGEAID TPVFEKTEL TKGYGE---D
4103154 -----GTR DFGREQMAIR ERAF5IITSV FKMHGVALD TPVFELETL MKGYGE---D
6325290 VSLKTPKGRF DWADSDMVR EAI5FSTL5GL FKHGGVTID TPVFELETL AGKYGE---D
32413441 LQIKTPKGRF DWHPDMLLR EQLFQTVSDV FKRHGQPLD TPVFELETL AGKYGE---D
19074312 TSLKTPKGTM DESPRQCFLH EEIIRIRRV FVLYGAVPIS TPTFEMKSL TNKYGE---D
21401251 MEIRNVKGTK DYLPDEEQLR SKIKRACEDT FERYGCKPLE TPTLNMVELM SYKYGGG-DE
Aaus-RS MNIQSVRGFH DILGDKAKKF RKISDTARKI LKLYNFEIIL LPVVEYAEFL QRSVGETTIDV
18310916 MAIQKQKGTK DMLPNDAIKV HYIEEKLRIK SAEYGIERIR TPTMEATELF KRQVGETTIDV
21402447 MSIQTPRGTK DILPGTVELW QYIEGQAREI CRRYNYKEIR TPIFEHELFL LRQVGETTIDV
Bsis-RS MGYNTPRGTK DILPGESDRW QFVEQIMRDT CRTYQYKEIR TPIFEHELFL ARGVGETTIDV
Ec12-RS KNIAQIRGMN DYLPGETAIW QRIEGTILKNV LGSYGYSEIR LPIVEQPTFL KRAIGEVTDV
SP03-RS GAIQAIRGTR DILPPETNYW QWVEIAKSI LDRALYQEIR TPIFEQTSLF ERGIGEATDV
22969029 AALQPVRGTH DYLPDEARSH RHVEETARTV AERFGFGEII TPIFEFDVDF ARTLGD5SDV
Rpi1-RS ENLQPLRGMK DLLPNDYQIH NYIINKARDV GALYGYQMS TPILYTKVF NRSMGESSDV
Rci1-RS EKLQPLRGMK DLLPDDYKWH DYIINKARDV GVLGYQMS TPILYTKVF NRSMGESSDV
Q8R880 --MIYLPDGVQ DFLPEEYEFK RNIEDKFREV FKSFGYKEIM PPTFEYSENF SHLFD5---D
BaAnth-RS2 WKRANPNGTR DYLFEECTLI EEEVQLKRRT FLERGYEIER TPTIEFYDVF AFQSRP---I
034459 FMFEKPHGMR DTLPLGYETK KKVRRSLTDL IDKWGYQFME TPTIEFYDVF GVQSAIE---D
067223 MKTSLISGER FYSLEESNLV KEIFKAVKVI FEAFGYDINL LSHFPEYEFQ ELTFGE---D
Q55267 MVHQPPAGTR DLLPQDVTQK RWIESRLQQV FQWQYQRII TPTLERLDTL VAGGAV---D
Q9RUE3 STSALPAGVR DVLPAAEWERR EHLRSHLSD LRSWGYRGVD LPALELADPA HPQGNH---D
Q9HUM5 DRWLLPDGIE EVLPPEAARI EAARRVLDL FHRWYEFVY TPHEIYELSL LTGAGQ---D
Q9JV26 QTWQLPEHIA DVLPNARQL ESAREQLLAL FRVHGYELVQ PPLMEYHSL LTHIDAG---L
RhodRub-Z ARALLPNGLR DVLPDAAFE VATVERLVSV FAANGYERVK TPLIEFEGL LTAGSR---A
Bmis-Z ----- --MTMVGSR TSPFNALRVE LNAREALVE IPLIQPADPF LDMAGED---D
Atsh-Z ----- --MPLIDM PEFAGELLE EFAARRTSRVN TPVIQPAEPF LDMAGED---D
Smti-Z ----- --MPLINL PAFAGDLLAD FERRNTRVD TPVIQPAEPF LDMAGED---D
Mlti-Z ----- --MTRSRF PATAANITKL FAARRNTHAVE VAILQPADPF LDMAGED---D
Ccus-Z --MRCARSSG VEVLRSRISIP APALDAIRAP LLDAGAVLTD APVLQPLGLL LDLAGEA---D
RhodSphe-Z AAGGSRRP6GA GHALVTKAAV RAAEALFAA FQAAGALPVE ADILLPAGTL LDLYGED---D

IQKELYRFKD HGDRDVALRF DLTVPARFV SLHHQMPFKR YAIQNVFRGE RAQKGRYREF
IQKELYRFDD HGGDRDVALRF DQTVPLARFI SQHRNLPFKR YAIQNVFRGE RAQKGRYREF
GDRLLFKVLN SGDCEKGLRY DLTVPFARYV VMHR-FPFKR YQIQPVWRAD RPQKGRYREF
GDKLLFKIQN SGDCEKGLRY DLTVPFARYV VMHR-FPFKR YQIQPVWRAD RPQKGRYREF
GDQLYKILN SGDSKALRY DLTVPFARHV VMNR-FPFKR YQIQPVWRAD RPQKGRYREF
EDRPNAGVFS LQDQWMSLRY DLTAPLARYF SENF-KPYRS YRLGFVFRNE KPGGGRFRQF
EDRPNAGVFS LQDQWMSLRY DLTAPLARYF AENF-KPYRS YRLGFVFRNE KPGGGRFRQF
SDRPNAGVFS LQDQWMSLRY DLTAPLARHV AENF-LPYRT YRAGYVFRNE KPGGGRFRQF
SDRPNAGVFS LQDQWMSLRY DLTAPLARHV AENF-LPYRT YRAGYVFRNE KPGGGRFRQF
QDRPNAGVFS FQDQWMSLRY DLTAPLARYV AENF-KPYRS YRNGWVFRNE KPGGGRFRQF
QDRPNAGVFS FQDQWMSLRY DLTAPARFV AENF-KPYRS YRSGWVFRNE KPGGGRFRQF
QDRPNAGVFS FQDQWMSLRY DLTAPLARYV GERYGLPYRS YRNGWVFRNE KPGGGRFRQF
ESRLIWRFQD PWGRNYALRY DLTVPARFV ASNPLPFKR YHIGKVVWRHE EPQKGRYREF
PNEGVSFQD DDEQWMSLRY DLTAPLARYV AENFETPYRS YRNGWVFRNE KPGGGRFRQF
PNEGVSFLQD DDEQWMSLRY DLTAPLARYV AENFDQPHRS YRFGWVFRNE KPGGGRFRQF
PNEGVSFAWQE SEGDMALRY DLTAPLARYV AQHRNDPYRR YAMGPVWRNE KPGGGRYRQF
VSKEMYTFED RGGESITLRF EGTAACRACL VTNGLTPQVK FYHGSMPFRYE RPQKGRYRQF
VSKEMYSPFD RSGEQLTRP EFTAGLTRAY LSTGWQPCIK ATHGMPFRYE RPQKGRYRQF
ITKEMYSFND KGGKSITLRF EFTAIVRLL IEKKLQPIKL FSTGPAFRYE RPQKGRQRF
INKEMYTFYD KGGKSITLRF EFTAIVRLL VEKKLQPIKL FSTGPAFRYE RPQKGRQRF
VTKEMYNFKD KAGEDITLRF EFTAIVRLL ISKNLTPVKL FSSGVPFRYE RPQKCRQRF
IGKEMYSPFD RGGDVLVLRP ELTAAVARML ICERLTPARL FTFGPVFRYE RPQKCRQRF
SDRPNAGVFA LQDQWMSLRY DLTAPLARFA AQNW-KPFKR YAFGPVWRNE KPGGGRFRQF
EEAESRLIWR FQDRNYALRY DLTVPARFV ASNP-MPFKR YHIGKVVWRHE EPQKGRYREF
EEK---LIYR FEDRRALRY DQTVPLARVT AQYAGLWRR YAYGPSYRGE RPARGRYREF
TERQVYVQS TGPELALRF DLTVPARFV AEYEHFPRR YQMQRYRGE RAQGRFRREF
TERQVYVQS TGAPELALRF DLTVPARFV AEHEHFPRR YQMQRYRGE RAQGRFRREF

```

TEKQVYRIDN E--RKQVLR DLTPVPSRFA AQYMSFFPKR YQLGKVRGE RNQKGRYREF  
TEKQIYRFNK G--TDLSLRF DLTPVPLARYV SQHFSFFPRR YHISKVFRGE RNQKGRFREF  
GDNIIYGLPE ILPEARALKF DQTVPLAAYI ARHLNFPFAR YQMDVVFRGE RAKDGRFRQF  
TSKEIYLLSR LQEERLGLHF DLTPVLSRYV VEHSGFFPKR WQIQKVVWVRGE RPOQGRFREF  
TSQEIYTLQR LQAARLGLHF DLTPVFARYV AQHFNFPFKR YQIQRVWVRGE RPOQGRFREF  
TDRQLYSFED NNGRPPVGMRF DLTPVLRFA AQHIGTFPKR YHIAPVWVRGE KPOQGRYREF  
TEKQMFVFDV KGGDRVALRF DLTPVPLARFV ATHYAFPFKR YHFAKVVRGE KPQMGYREF  
TEKQIYRFNK NNGRDSVSMRF DLTPVPLARFV ATNLSLPPFR SQFGKVRGE NSQKGRYREF  
VVKQLYAFKO KGGDRVSLRP DMTSSVARYL VNMFKPKIKW YYIANMFRYE EPQSGRYREF  
IRKQLYVFKO HGGREMLALRP EMTSPVVRFY LNELKKLRLR YYFANCFRYE RPQAGRYREF  
IIEEMVYFKO KSGRDLALRP ELTAPVMMRF VNECSKPLRF YYFANCFRYE RPQKGRYREF  
VWNIYHFD KGGRELALRP ELTAPVARYL MNEMQKPKIKM YYFGSCFRYE RPQAGRYREF  
IRDQLYCFED RGNRRVALRP ELTPSLARLV IQGKGLPLKW FAIGQCVRYE RMTGRRRREH  
LLQQTYSFVD KGGREVTLIP EATPSTVRML TSKRDLRPLW YSFPKVMRYE EPQAGRYREF  
LLNQYYSFVD RGGREVTLIP EATPSTVRML TSKRDKPVWV YSFPKVMRYE EPQAGRYREF  
IVDELYSFVD QGGROVALTP ELTPVARMV VAKQKPKIKM YSSRPFVRYE EPQAGRYREF  
VERQLYDFID KGERRVAIRP EMITPLARMV AGNLRKPVWV FSIPLWRYE QPKGRLREH  
DSKLYDLDK QGGELLSLRY DLTPVFARYL AMNKLTKIKR YHIAKVYRRD NPAMGRYREF  
DSGLMYDLK QGGELLSLRY DLTPVFARYL AMNKLTKIKR YHIAKVYRRD NPAMGRYREF  
MQEPDLPK SRGLAENRG TLTPVFARYL AMNKLTKIKR YHIAKVYRRD NPAMGRYREF  
DSKLYDLDK QGGELLSLRY DLTPVFARYL AMNKLTKIKR YHIAKVYRRD NPAMGRYREF  
DTKLTYDLDK QGGELLSLRY DLTPVFARYL AMNKLTKIKR YHIAKVYRRD NPAMGRYREF  
ILKEIYTLQD QGKRDALALRP DLTPVFARYL AMNKLTKIKR YHIAKVYRRD NPAMGRYREF  
VQKEMFVFD RKGKRLALRP EGTAGTVRAF IQHKLPLYK FYEGPMFRYE RPQAGRYREF  
VQKEMTYFED KGGRSITLKP EGTAPVRAF IENSLQPTKM FYFTPCFRYE KMQKGRLEF  
VQKEMYSFQD RGRSLTLRP EGTAPVRSY VENKMQPTKL YYIGQMFRYE RPQAGRYREF  
VQKEMTYFED RGRSLTLRP EGTAAVRAF NENKLOPTKL YYVGMFRYE RPQAGRYREF  
VEKEMTYFED RNDGSLTLRP EGTAGCVRAF IEHGLQEQRL WYIGPMFRYE RPQAGRYREF  
VQKEMYSFQD RGRDITLKP EGTAGVRAF IEQNLQVQL WYIGPMFRYE RPQAGRYREF  
VTKEMTYFED RSGDSLTLRP ENTAGVARAF ISGGLVPVKL FYRGMFRYE RPQKGRLEF  
MSKEIYFVD KSNNAVALRP EFTSGIRSF ISNGLLPLKF FSTGPVFRYD RPQAGRYREF  
ISKEIYFVD KSNDFVALRP EFTACIIRSL ISNRLPLKF FSTGPVFRYD RPQAGRYREF  
--NSMYFFD KKGILALALRP DVTAQIARIV STKLEYPLK CVYANVRYE DTQGMFRYE  
DEEKMYFFD EKGRIVLALRP DMITPLARV GTQRCTPLKV TYSGNVFRAN ESLAGKYNEI  
-EQQLFKLD QDGKTLVLRP DMTQPARVA ASKLLHPLRV GYAANVFRQ EREGGRPAEF  
GSKAITFKD SYTESFGLRL DFTTQVVRTI SHLRNLPERV YFGKVFSLD RRGF---EK  
QRSVAIVQVS DEESGLLRP ELTASIAARA VTRLALPLRL YYLANVFRPA FQDGLQOREL  
----AFKLD SGGVVALRSL EYTTALGRVL GTHFPPLRL YQGGRLWLR QTSEGRLEF  
LDRITLVTD PASRLMGFRA DITPQVARMV AHSRGPVSR CYAGSVLHAQ PRAL--TSRSP  
SLKTLVTD LSGRQLGIRA DITPQVARMV AHSRGPVSR CYAGSVLHAQ SDGLNMRP  
TAGQFRVMD PITRMGLRA DITIQUARLA ASRLARPLRL TYSQVLRVK GTQL--PERQF  
LRRRIFL TEN ENGSCLLRP EFTIPVCRNH IALNATPKRY AYLGEVFRQ RDGA---AEF  
LRRRIFL TEN ETGESCLLRP EFTIPVCLRH IETATPKRY SYLGEVFRQ REGA---SEF  
LRRRIFL TEN ETGESCLLRP EFTIPVCLRH IETATPKRY AYLGEVFRQ REGS---SEF  
LRRRIFL TEN ETGTQLLRP EFTIPVCLDH ISSQATPRY SYLGEVFRQ REGG---NEF  
MRSRLVFSV EAGEACLRL DFTVAVARQH FEGGGAGRR RYEGKAFRVA PRGSDRAEEF  
IRARAYVTD PLRGMMLRP DFTVAVARQH MAEGAEPARY TYMGVFRQ EHAGPRAEY

TQCDPFIGS ESLVDAEII QVIAASLAL DLEDFCVSIN HRKILNGICE YFGAQ---VN  
TQCDPFIGS ESIGSDAEII QVYASLAL GIERFTISMN NRKILNGICD YFGKEQ--TS  
YQCDGFIGS DLSLNEVELI QITSEVFRLL GIR--TRILL NRKILSGIAE VVD--EADRLT  
YQCDADVGS DLSLNEVELM QIVDTVSRF NIR--VCIKIN NRKILSGIAE IIG--EADKIV  
MQCDADVGT DLSLCEAEIV LMIHEAFAA GITDFVVKIN NRKILSGIAD AIG--KEGSEA  
MQFDADIVGT PTVAADAEIC MMAADSLQKL GFQHYVIRLN NRKILDAVLE KVGEOQRRL  
MQFDADIVGT PTVAADAEIC MMAADSLQKL GFQHYVIRLN NRKILDAVLE QIGKAEKRL  
MQFDADIVGA AGVQADAEMC MMAADTMEAL GIARYVIRVN NRKVLGVME AIGDNAGRRL  
MQFDADIVGA AGVQADAEMC MMAADTMEAL GIARYVIRVN NRKVLGVLE AIGQNTNRL  
MQFDADIVGA PNVSADAEMC MMAADTLERL GIQRYAIRVN NRKVLGVLD AIGGNAAKRL  
MQFDADIVGT PGVAADAEMA MMAADVMEAL GIKRYVIRVN NRKVLGVLE AIGENIGRRL  
MQFDADIVGS ATPAADAEIC MMAADTMEAL GVQRYVVKVN NRKVLGVLE AIGENARRL  
YQCDADIVGS PYPEADAIEV SLAVDSIDAL GLPGFRVRVN DRLLLAGVFE EELG--FDNPL  
MQFDADIVGA PNVSADAEMC MMAADTLERL GIQRYAIRVN NRKVLGVLD AIGLNAAKRL  
MQFDADIVGA PTAADAEMC MMAADTMEAL GIPRYVVKVN NRKVLGVLE SIGLNAGRRL  
YQCDADIVGS ASMAADAIEC AMLSDTLETV GIPRYVVKVN NRKVLGVLE TMLDEGQRD  
HQIDAEIIGA ESPLRDAEII AMAQDILREL GLGD----H VTLNLTLDG LASR--QAWRE  
HQIDAEIIGA AEPEADVELL SLADQLLESL GIKQ----H VTLNLTLDG SASR--EAWRA  
HQINFEVFGI EDPKADIELI SLAQHLTEF GINK----N VKLEINSLDG GETI--KYRE  
HQINFEVFGI ENPKADIELI SLAHLTEF NISK----N VRLEINSLDG SETI--AKYKE  
HQINFEVFGS DSPADVEMI SLCYNISEL KLSL----R IKLEINFLDG QETI--SYKI  
HQINFEVFGI G--CTADAEIM ALAYDILGAL NLRVQLEIN SLGNQDSILG YRNS-----  
IQCDADIVGS ARPEADAIEI AMAVEGLEAA GLPRAVLKIN NRKLNGLLT AA--DSAQKL  
YQCDADIVGS PYPEADAIEV SLAVDSIDAL GLPGFRVRVN DRLLLAGVFE EE--DNP---L  
YQFDLIVGS ASPLADAIEV AMLCEALAT GFPGFVTLN HRQIIGGIAR VSGEAG---  
YQCDIDVIG QSIRYDAEVL AVIHAVFSEL GIGDFQVQLN NRKVLGRFLE SQGRDGLQL  
YQCDIDVIG QSIRYDAEVL AVIHAVFSEL GIGDFQVQLN NRKVLGRFLE SLGAEGLQL  
YQCDVDVGN GSIKNDAEII NMASKALRKI GLDSYKQIS NRKILTVGLE GLNTN---MQ  
YQCDIDVIG GSIINDAEIP SIIYQFKEL GFEDFTIRIN NRKVLGNFFE GTDED--RK  
YQCDIDVGR ESLLYDAQMP AITTEIFEAV NIGDFVIRIN NRKVLTFGFQ SLNSETQ--IK  
VQADIDVIGA GPDHYEVELP LVMVEELRAY GLPKATVHAN NRKLVSEFYR GLGTD---VE  
TQCDIDVIN DPLHFAELP RIVHEVLTP DIPAWLNIN NRKVLQGFYE GLGTD---PL  
YQCDPDTIGT TSELADIEAV CVIDALRAI GIDAFITISIN NRAILTGLLE SLG--LADKTT  
TQCDPDIAGS DSVCAFDEL KSIK--MLYMA GAH--IHVA HRGLFDRFLR ALS--LSDQAE  
MQFDPIVGE DTFRGADEL SVVYEIIFLN FIEGFIHYS HIGLNSFFE KLG--LKEKSI  
WQAGVELIGS DKVEADAIEV ALFVESYLAT GLREFTVNIQ DRILLDEFK MLG--VKDDI  
WQMGCELIGS KEPLADAIEV NLAMDGLINI GLD--FDVHIG HLGVLKGVLE KFNVSSEEEV  
WQFVELIGS ESYLADAIEV ILADKILKDV GVN--FSLEIG HVGIMRHLK PIG--EDRAS  
WQFCELIGS RSPLAIEV SLASESLHEL GLDGEVHIG HLGILRILG REEIPSELQD  
YQNMIDVIG PQVTAIEV SSVITFFKRI GITAVGKVS SRKVLQELK KYGVPEDLFG  
YQFNADIFGS DSPEADAIEV ALASSIDLRL GLQDYIEIRIN SRKIMEIIG GMT--SSDFP  
YQFNADIFGP SNEEADAIEI SLASGILDGL GLSGYEIRVN SRIMMEDILN GMG--IADPY  
YQTNLDIFGT SDPRADAIEV AVAADGLTSL GLTGFVFRV HRDILGGLLA AFD--ATVDE  
WQLNVDLFGV DSHRAELI LADSLKFK GAPYQIKVS HRKLLDSFLK NSLLNGDQVH  
YQCDPIAGN FPMIPDAECL KIMCEISSL QLDGFLKVN DRRLDGMFA ICGVSDSKFR  
YQCDPIAGN FPMIPDAECL KIMCEISSL QLDGFLKVN DRRLDGMFA VCGVPESKFR  
YQCDPIAGN FPMIPDAECL KIMCEISSL QLDGFLKVN DRRLDGMFA VCGVPESKFR  
YQCDPIAGN YPMLPDAECV KIVSEILDITL DIGDYIKLN HRQLDGMFQ ACGVPDSFR  
YQCDPIAGN Y--MEPDEVEL KVLTELDK DIVVEIKLN HRKLLDGMLE ICGVPAEKFR  
YQCDPIAGN F--MVPDEVEL SILVEGLTSL GIKDFIKLN HRKLLDGMFQ IAGVKDEDR  
YQCDPIAGN Y--MIPDAIEV RIIVEFDAL KLG--ITIKLN HRKLLDGLFA VAGVPAEKFR  
YQCDPIAGN C--MMADEAVV SCVDRILSMF GIGYEIRKVN DRRLTSLLE VVGVSCESYG  
IQCDVDIVGV E--VMAEALM SMAFELQTL NLEV--TIQYN NRKLLNGILQ AINIPTELTS  
HQIAGEVFGV A--HADAIEI KIVYDILQAL GIKGVVEIN SLGCKK----DREAYRE  
HYGIEVFGS QEASDAIEI SLVMALEDTF GIKGLSLNIN SLGCKPKRAK FNE-----

VQFGIEAIGS NDPAIDAEVI ALAVEFYRGM GLKN----- IKVVLNSLGD AAS-RQAHRD  
YQFGIEAIGS KDPAIDAEVM ALAM-IYEKA GLEN----- VKLVINSLGD QDS-RKSYRE  
HQLGCEVFLG QGPDIDAEIL MLTA-WWRAL GISEVTLELN SIGSLEARAN YRD-----  
HQLGVEVLGS ADPRADVEVI ALGTDLKAL GLSN----- LSLALNSVGN GGD-RQRYRE  
HQVGVLELGA E-PLADVEVI ALGSQLLGAL VGGG----R TILHLNSLGD PES-REAYRA  
HQLNVEYLGA K-AITDAETV KLAVIDLKAL EIEE-TLELN SLGCHESTRIV YQQ-----  
HQLNVEYLGA K-AITDADTL KLAVIDLKAL EIEQ-TLELN SLGCNESRSV YQQ-----  
TQAGVELIGT NHEESDAEVI ALSIEALKST GLKDFKIDIG HAEEVFGSIVR NMLNGNEDVN  
VQSGIEVIGI D-VRAEIECV ISVIQSLKQL RVQSFITIEIG QVQLYKIVK KLSIHEEEK  
EQVGVLELGD GTTSADAEVI ALVV-ALKNA GLASFKAITG HAGIADALFV EVL-NVERAD  
LQTGVLELIGE KSLILADFEVI QVLTFLKSL GLKDLKVLIS HAGIVRKVAD ERE-----  
FQAGVELLGV GGTLADAEVL HVLADALAEI FGGQWHLVWG EASLTRSLLQ PFP--KDLRE  
NQVGAELIGV T-VQADAELL ALAHAALGQA GVQA-QLEVQ FPGFVDAALT DAGLPGPVRA  
IQLGAELYGD PSPASDVEVI SLMLELEMA EVPDVHMDLG HVGIYRGLAR AAGLSGEVEQ  
LQAGAEMYGF A-IRGDIETI DLMKSKMIA DMGKVLVSLG HIGIFRALSD AAHLDAQSQA  
TQAGIELIGA GGVDAIAESV LLTVEALQA GLPRVTVDLN CPPLVPALCR ALGLSEDLG  
LQAGIEDLGA AEAASDARSL ADAL-CVKAT APDALEIVLG DQSVFAGMLK ALGLPQGNRK  
YQAGIEDLGD TIAAADARVV IDATAILQRL LPGR LAVTLG DQVFEAVVA ALGLPLGWQK  
YQAGIEDLGD PTAAADARVV GDAM-FVLAN RLPGLKVTLG DQSVFEAVIA ACGLPGWQK  
FQAGIEDLGD RTAQADARSV ADAH-ALLSL VLPGLAVTLG DQGFIEAVLA ALGLPRGNRM  
LQVGEAFET G-VAADAEMA ALAWASAVAG GREDLSVLVG DVSLFSAFVE SLDLAPPLAA  
LQVGFELFDR T-EAADAEVF ALIAELLAPL GLQA---ATG DIGILMAAVR GLSTTEKRAA

EVLRIVDKLE KIGLNGVEEE LKKECDLDSN TIKDLEMMVQ IKQNEFFEKI AYLKDYENEL  
DVLRIIDKLD KIGEEVVIKE LVEELGSLQE SARGILGFTS LKQ-EFFAKV ASYGLSDSL  
DITVAIDKLD KIGLQKVNDE LRT--GFEE AIERLRPFIE MKGDEKDLR KSALASSETG  
DITVAIDKLD KIGLENVNAE LKE--GISDE AIAKLOPIIL LSGTEKLATL KSVLAASSETG  
ELCVAIDKLD KIGKEAVLEE LKT--GFTDS QLTRLLPVFD LKGNIEFPL RTILAQSVMG  
TVLRAIDKLD KFGLEGVRL LGKGRELKD EIDGILSLLT IEVGETFDAL RKIVDQSEEG  
TVLRAIDKLD KFGLEGVRL LGKGRQLKQ EIDSVALLT GEAEETLDAL RHVVGHHIQG  
NVLRAIDKLD KFGPEGVRL LGPGRGLGDE QIEKLVFPVQ IK--ASADDL AKLVAGTSKQ  
TVLRAIDKLD KFGPEGVRL LGEGRGLNEE QIEKLVFPVQ IT--RSADL AALVAGTARG  
NVLRAIDKLD KFGPEGVRL LGKGRQLPEA AIEKVLAFTA AGGAQTIANL QAVVAGNAEQ  
TVLRAIDKLD KLGPGEVRL LGPGRGLNG QAEAVLQATA RN--AQAAQ DSVSDVNATY  
TVLRAIDKLD KFPADAEVRL LGPGRNLSAA EADVLAITK PRD-EAIAAA EAYLAKSEVG  
PIYRAIDKLD KIGVEGVRRE LERL-LPGS TVERIMEIIS WRGREVLESV RRGVGSNEKV  
NVLRAIDKLD KFGPEGVRL LGKGRQLPEA AIEKVLAFTA AGGAQTIANL QAVVAGNAEQ  
TVLRAIDKLD KFAPEIKKL LGPGRNLSDD QSELILRATS PSFIIDTVEL LRSTADNETL  
AVLRTIDKLD KVGEDGVREL LGKGRNLSDD QAGPVLAFT SRRGATTVAN RAAVAGSQIG  
ALVAYFRDHA DALSEESRVR LEANPLILDS KSEQDRKLLD AAPA-FADYL NDDSRQF---  
ALIEYFGHFH DLSLQESQER LTRNPLILDS KDPNDKIAE KAP--IIDDY LTHEAAS---  
ALILYFTKYQ NDLSSESKNR LTKNPLILDS KDEKDKIIS DAPK--ISNY YTKESD---  
LVLPIYFKFQ NDLSSESKNR LTKNPLILDS KDEKDKIIS DAPK--ISDY YTKESD---  
HLVEYLNKYQ KDLSEDSQRR LVNPLILDS KSPEDCKILL NAPS--ISDF YTONSQN---  
--LLKYFEKHE HALSEDSRRL LQTNPLILDS KDRGDIALLC GAPV-IADFY DDESNMT---  
AVLRAVDKLD RLGVDGVRL LGEGRGLKQ AVDQVDFVQ AGSTATLDNI ARVAVGSAEQ  
PIYRAIDKLD KIGVEGVRRE LER--GLPGS TVERIMEIIS WRGREVLESV RRGVGSNEKV  
GYRAIDKLD KIGADGVRAE LTK--GVTPA AADQILELVQ IDGTEVDAL AQKLAADERA  
AVLREVDKLD KRGVLDVRL LGQ--GFGIP AAQVENILTF VATRSHADAL VRLDALTEML  
AVLREVDKLD KRGAEYVRT LAGE-GFGIA AAQVDKILAF VAVRSHADAL AQLQALEVTL  
EVMILDKYD KITTEQFLSE LNKL-IGEE KAKVISKVIK ISGSEVENL KKVETKNEMEL  
GLVRAIDKIE KIGEDGVKRE LQEL-GLSDS KIDKIFINFI IKGTVEIKSL KLDIENDVDF  
SCISIIDNLE KIGEAQVLE KEKE-GINPE QTKIIFVVK IDGSDVLDK KHLSQLTEQF  
GLVREIDKLD KIGADAVARL LTTETCGATEA QARAELAE LTAACEAHGI VKDSEAYTLA  
AVIRAVDKLH KIGADAVREI LIDQAGLSSD QAAACLELAE IRGSTVDDAV AKLVGSHPTL  
PVLRSDLKLG KIGREKTANE MVES-GVTAE QADAVLRLAE CDGDSILASL PEITGGNETA  
HILRIIDKRA KMAPHVLTQA LESLCPVRVQ KIMTYVSAGE VDGVHTLSAI ETLTGG--V  
FILRNIDKID KIG--IDKV KEALLEIEKE AVDSILSLVS LQG-DKIQAL KSLIG---D  
GLMRIIDKLD KLPQEDFINA LKEFG-LDKN GIEKLELILN IKGKDEVPL AEELFTSEVA  
KIRRIIDKED YDNLKIVLQ ILG----EE KKEIFIFILK FKGSVELDEL KEILKDF-KS  
KVMRLIDKLD REGLESYLAE IRVN----EE LRDKIFSLLE LKGDSEVIEA KEIIDY---  
RIMGVLDKLD VELEALLGE VEVS----GE SRELLMKLIG TQGGVELDDV EYLYGGY-ES  
RVCIIDKIE KIPIDEIKKE LGFTG-ISED ATEQLLQVLS VKS---LDDL EDIIGGA---  
SVFSIIDRYH KISREEFVQD LRSAG-IGED GVSMIADLCS GTRG--IDEM ARITGKS---  
TVFSIVDRFH KVSKEFVQD LMSVG-LSEE NSNTIYRMCES EASE---GGI SGLFGSG-KV  
AAIRTVDKRE KIERAAYLDD LAAAG-LSYD QAEQFDDLLD GDD---LDAL VSFAGTD--V  
GVSLLDKKS KISPEAFETE MKPFL---- NFKEQFSLIE TYLN-NLETV SKIPGID---  
TICSSVDKLD KVSWEVKNE MVGKGLAPE VADRIGDYQ QHGSLVEQL LQDPKLSKQA  
AICSSVDKLD KMAWKVRHE MVVK-LAPE VADRIGDYQ CHGSLVEQM FQDPKLSKQA  
TICSSVDKLD KMSWEDVRL MVAGK-LAPE VADRIGDYQ CHGSLVEEL FKDPKLSQLA  
TICSAVDKLD KSPWADVRKE MVDEKGLDE AADRIGEYVR LSGGELVEQL LANEKLN-NA  
TVCSVDKLD KLTFEEVKKE LVEEKGVSN TAENIGSLVK TKGPEVLEL RKEGSKFEGS  
KISSAVDKLD KSPWEAVKKE MTEEKQSEE TADKIGEVYK LINGSEIHAV SADANITEKA  
TISSAVDKLD KMPWADVRKE MVDEKGLPEE VADKIGEVYQ NAGNDIINYI KADADLPDDI  
TVCSVDKLD KMSWEDIGRE LVLKG-LSEE QVRTTKYMT MGGKDLGLL KADPYGGERC  
DVLSDKIE KIGIDGVKRD VLREG-ISEE MADTICNTVL SCLQ--IADF KEAFNNP-LV  
ALLNYLTVGK EELCSDCISR MDRNP-LRVL DCKVETCKVA VREAKMIDFL CDECHEH---  
ALKQYLVKENY DNLCECTCKR FEKNPRIIDC KEKRCKEIVK EAPS-ILDYI CECSGDH---  
ALIAHFEPRI GEFCSDCQSR LEKNPRIIDC KDRNHLMG TAPS-ITEYL NEDSAVY---  
ALVXHFEPRI EEFCSDCQSR LHTNPRILDC KDRNHLMK SAPS-ILTYL NEESAAY---  
ALVAFLEQHK EKLDDEDCKRR MYTNPRVLD KNEVQALLN DAPA--DYL DEESREH---  
ALYALTPFK AELDPSQDR LERNPRILDS KAKRTQETVQ DAPS-ILDHL GVDQRH---  
ALVSYLSGHR DLSLRSLER LERNPRVLD KDEGDRAVVA GAPR-LIDHL NEASRAF---  
KLVEYLNDFK DQLSGESRLR LKNPRILDS KSEIDQKIIA HAP--ILSEY HTNESKK---  
KLVEYLNDFK DQLSEESKIR LSKNPRILDS KSETDQKIIA NAP--VSEY YTDSEKE---  
LLRELEQKN QSAIEDFIKQ KEIKR---E EAKLRELP LFGGELLEK KKENFKE---  
FLRTYIESKN YASLSNFIRD KKLDR--CDE TVKLELKLPR LFGGELIEA EKLAASN-EM  
LRRFLYEKN YVGYREHVKS LPLSS---I DKSRLLELLE LRGGEVCGRA EEIVDSA--G  
ELLRAFERN LEALKEVLG----- --NDIKFVVE VSKNEVNLFL EKYDLEK---  
KVRQATAQFD RVTLESPLLE SQR----- --DRALLLHD LRQGVFALK QQLTLTP-LE  
ALHDAIRKS GADDLARQ HGVS-----E VTRTLHSLTE LYGGEVLEA RVLARGV--A  
QLFDALQRKA VDEVEALTD LPAEL----- --GMLRALAE LCGGDALQEQ RARLAAAADV  
TLLALMQDKD TETVEAQVKA WKLDG----M WAKAFSLPR LYGGEVLEA RGRPLD---  
ELRKLLEQKD FTAAAAAGD AAG----- ALSALSGTV PAER-VLAAL DLPGEEA---  
KLLRSFGDAH SMDLALAEI GTQRR-----D PLPESLAVL AEGD--IGLA R-----  
RLVQAFGDMA QLDALLESLV HPKQ-----MTG LDRVAVGLLA TGEVLDVYL DTMVQET---  
RLTHAFGDQK QLERLLAALA DPKSPGVFVH DVERVAALGM LEDERLVAHI GETMKAT---  
RLARAFGSAP MLQAALADLA NPPRN-----G QLSGEVAALV LDGD--LDGL STHIAGG---  
RLTRSFAPR QLKAELDGDV AAPTG----- --EQSRIAA LLAG-----L PEAEAS---  
ALLRHWRPT RFRALLDRFA GRTPV----- -EARLRLDR LAGA-AVALM EAAGPAI---

KGQIQDLERL YQLLDLQIS QNLYKIDFSI ARGLGYTYGI VYETTLNDKS LGSVCSGGRY  
REGMGEMRAL YAILDTLEMD RACYKINFSI ARGLGYTYGI VYETTLNDAPS IGSVCSGGRY  
LKGIEELTYI LDKVERVQLH S-ELMVDISL ARGLSYYTGA ILEVKALDAE MGSITGGGRY  
MGVVEESEFI LGTLETMGLK N-EIELDLTL ARGLNYYTGA IFEVKALDVQ IGSITGGGRY  
LKGIDLEKVK FTLIEKSSGLG NASIETDLTL ARGLSYYTGA IFEVKLVNVQ MGSVCSGGRY



LEGVRELEEM QAIFAENDT- QNRIKIDPSV VRGLEYYTGP VFEAALLFV FGSVGGGGRY  
LEGVRELEEM QAIFAANGY- QNRIKIDPSV VRGLEYYTGP VFEATLLFV FGSIGGGGGRY  
EEGVDELNTI GALVSGAGYD ATRIKIDPSV VRGLEYYTGP VYEAELTFV FGSVGGGGRY  
AEGVNELENTI RGLVLSAGYE ADRIKIDPSV VRGLEYYTGP VFEAELQFV FGSVGGGGRY  
EEGVQELADM QALFVAGGY- EGRVKIDPSV VRGLEYYTGP VFEAELLFV FGSVGGGGRY  
QEGVGELEATI EALVRAAGYD EDRIAMDRSV VRGLEYYTGP VFEAELLAVR FGSVGGGGRY  
QAGVSELEEI AKLVMASGYG ADRIKIDPSV VRGLEYYTGP VYEVLLVLR FGSVGGGGRY  
REALDHLHEEM LSLADDDR- ---VELDMSL VRGLDYTTGP ILEVLLDEPR TGSVAGGGRY  
EEGVQELADM QALFVAGGY- EGRVKIDPSV VRGLEYYTGP VFEAELLFV TGSVGGGGRY  
KQGCDELAVI ADLLDACGYD DVRVIDPSV VRGLEYYTGP VYEVLLDFT KGSVGGGGRY  
VQGIDELEQI GDLLAAGGY- PDRIVIDPSV VRGLDYTTGP VYEAELTFE FGSVGGGGRY  
----WDGL RSSLQAFG- ---VDFVNPRI VRGLDYYSHT AFEFVTSKLG AGTVLAGGRY  
----FFKAV TTGLDAAG- ---VAMTRDPR VRGLDYRHT AFEFVTDQLG AGTVLAGGRY  
----FFEQI LNGLTILDI- ---YTVNKL VRGLDYCHT VFEFVTEDLG AGAVFAGGRY  
----FFEQI LNGLTALN- ---IPCTVNSKL VRGLDYCHT VFEFVTEDFG AGAVFAGGRY  
----FFKEV LDGLDNL- ---INVINHNI VRGLDYCKT VFEFVTESELG SNSVIAGGRY  
----FNGV MQQLDNLG- ---IPYTVNPR VRGLDYCGT VFEFKTSLG SDAVIAGGRY  
DEGLLELSRI DAALSSGLIA DDQAFIDPSI VRGLEYYTGP VFEAELLVSV FGSIGGGGGRY  
REALDHLHEEM LSLAD- ---DKRVELDMSL VRGLDYTTGP ILEVLL- ---R TGSVAGGGRY  
VAAIANLRAV LDGLMAMGVP AEQYRVAPRL ARGLSYTYG VFEAIT- ---WP EGSLLGGGGRY  
RQGVAELEREV LTLVNLVLPV EHAYLNFISI ARGLDYTYG VYETSLINPQ IGSICSGGGRY  
GEGIAELREV LELVKALGVP ETAYCLNFSI ARGLDYTYG VYETTLTDPQ IGSICSGGGRY  
EGGIEVEEVV IKYKLFVGE DSEYAINLKI IRGLDYTYG VYETTLTGES YGSICSGGGRY  
KEGVYELEKV VHYIKSFNVP DKNYKIDLTI ARGLDYTYG VYETVLLNPP IGSVCSGGRY  
NLGVSELETV ITGVNRLVGP DKRFIDLAI ARGLDYTYG VYETTLIGEA LGSICSGGGRY  
RQGLDTLAMI VD- ---EAAAIR PGSVIADLKI ARGLDYTYG VYETFLDGA LGSICSGGGRY  
TAGLDELGEV LD- ---ELSDLP SGVSVADLSI ARGLDYTYG VYEAFTNDPG YGSICAGGRY  
AAGIERLTOI YRGALASGVS PDRKIDVSI ARGLDYTYG IFETTLDEPG IGSVCSGGRY  
SEESTRLRKI YELLCVNIQ 5-SYVFDPSI TRGFDYTYG VCETFLTQPH IGSVCSGGRY  
NESIKRVEDV FQHLSLKIQ D-SFNLNLKI SRGLDYTYG VFESEVFN MGSVCSGGRY  
KNEINRLYAL IDLLEAYEVK D-WIRLDLGI ARGFYTYSTI VFEAIAPNLG IGSIGGGGGRY  
MEAINLEETI LEFVH- ---DKYIINLGI ARGLDYTYG VFEIYKKG- G AKQICGGGGRY  
---FGHLESL SALLRDVG- ---VDFTLNLI ARGLDYTYG VFEYCAEGB QKQVCGGGSY  
LEALEEFREL VETLHYFG- ---VDDYHVNLI ARGLDYTYG VFEIYVPEGA QKQICGGGTI  
-EAIADLKQL FSLAEKFG- Y SEWIOFDASV VRGLAYTYG VFEFVDRKKG LRAICGGGGRY  
SEEARMAAV EDLLASYGVK N- ---VRYDFSI VRGLSYTYG VFEAYDRSGQ FRAILGGGGRY  
SKAAERLIRT IDILKEYGVK S- ---VKYDFSI VRGLSYTYG VFEAYDKSQ FRAILGGGGRY  
RDAVANLRNV LAAETLGV- V RQYCDVSLTT ARGLDYTYG VFEFCFDSTDV GRAVFGGGRY  
TNSVSVIQLN FQELGELG- I DKQLLFDPSI IRGFDYTYG IFEVFDNEN RRSLYGGGGRY  
LEGLGDLKLL FEYTLFG- I DDKISFDLSL ARGLDYTYG IYEAULLQLG VGSVAAGGGRY  
LEGLGDLKLL FEYTLFG- I ADKISFDLSL ARGLDYTYG IYEAULLQLN VGSVAAGGGRY  
LQGLGDLKLL FEYTLFG- I ADKISFDLSL ARGLDYTYG IYEAULLQLN VGSVAAGGGRY  
VKGLEGMKQL LKYSIFG- L DKRVSFDLSL ARGLDYTYG IYEVLLKAT VGSVAAGGGRY  
VVALNELEIL FKALEKAN- A LDRISFDLSL ARGLDYTYG IYEAUVFKGTQ VGSIAAGGGRY  
KQGLDDIATL MKYTEAFD- I DSFISFDLSL ARGLDYTYG IYEVVTSVAVG VGSIAAGGGRY  
KAGIHDMEEL AAYLDALEVT D-KVSFDLSL ARGLDYTYG IFEVINKPSQ VGSIAAGGGRY  
KAAVHMEEL FRLCRILG- C SGSLVMDISI ARGLDYTYG ILEAEYVKS VGSVIGGGRY  
ADGVNELQQL QOYLIALG- I NENTIFNPL ARGLTMYGT VYEIFLKDSI TSSIGSGGGRY  
---YEKLKNY LKALDIP- ---FRENYNL VRGLDYTYG VFEAVSDEG- -LTLIAGGRY  
---FVSKL KAYLDVMG- ---IEYNIDPQI VRGLDYYSKT VFEVIKDG- -LTVCGGGRY  
---YDKVQEL LTMMDVP- ---FEKDPNL VRGLDYTYG VFEIMSEAGA ITTLLSGGGRY  
---FEKV QOYLNDLG- ---ISYIDPNL VRGLDYTYG AFEIMSNGA ITTLLAGGGRY  
---FAGL CKLLESAG- ---IAYTVNQL VRGLDYTYG VFEWVTSNGS QGTVCAGGGRY  
---FDQV QQLLNLG- ---IAYQLTPTL VRGLDYTYG AFEIQSSDGA QATVCAGGGRY  
---FAGV TGGLEALG- ---IPFEIDPLL VRGLDYTYG AFEFVTDGA QGTVMAGGGRY  
---YFDEL QKYLIDLG- ---IKYSVNPRL VRGLDYTYG AFEFVTKKGS QSTILAGGGRY  
---YFEEL IQYLIDLG- ---VKYSINPRL VRGLDYTYG AFEFVTKKGS QSTILAGGGRY  
EGVLEYLDRV KYILEDFFG- M KEYSFDLGM VQNLNYTYG IFRGVKGL- L GYAITCGGGRY  
KMAITRKEI YEAIKELG- Y GSYISIDLGT IQHLDYTYG IFKGYIYEG- -EIVSGGGRY  
KSVVDLKLAL WDILEDYGC- C TENVRDLNM VSHMSYTYG IFEVYAEV- V GFVIGSGGGRY  
--EKEELLE GLKLEEF- ---IDYAYDLGE VRNFPYTYG IFEVYELK- S GKALAGGGRY  
QTLRDRLAQL VELYNASAGQ DSPLLDLSL LRSFDYTYG VFEVYTYG PWLQAQGGRY  
EQAVEHLSAV HAAAEQAG- ---VELLDLGV SRRYGYTYG LFRAYVDG- I NQPVLLGGGGRY  
QVALNELTEI ADSLAGRFP- GLPLYFDLGE LRGYHYHTG VFAAFVPG- V GQVIAQGGRY  
-AVGALGEL QAVCDAFP- ---DCEITHDSE LRVNDYTYG LYAAAD- F HDAVARGGGRY  
--HRDALLAL ARKVMTAAP- EVDVTDPLE HKGFYTYG SFALFAQG- A RGLGRGGGY  
---MLEAEM EAGISPGAG- RTPVEIARR IEKEDLAHT FPAALDL- ---QFLAIRVSL  
---YSTNAS RSPLEIARR- ---LREKL ALAATRLPDE SFELLKQF- ---LALQAPL  
---YSTNAG RSPROIARR- ---LKEKVELAA IRLDKEALGV MRAFLALD- ---LPLADA  
-----MEQ AGLSASAGR- ---SPTDIARR IEKELRSVR LSNFAA- L KNFLAIHVPL  
--VLQELWSL AGIEPVGGR- ---RPAEIARR VEKADAAGK RLDPAQADKV RAFLAVSDRP  
-----L REPCEIARR- ---AALIEDAE AAPLGAEEAA VLDDLSL- E APAAALGRL

DHLTKNFSKE NLQGVGASIG IDRLIVALSE MQL-LDE-RS TQAKVLIACM HEE-FSYANR  
DNLTKQFSKE RMSGVGASIG VDRLLAALAE LGL-LEG-RG TSAQVLVACM EES-LAYSYSK  
DNLTKIFGLE GMSGVGISFG ADRIDVMMQ LDL-FPAEKL TGQTLLVNF SEE-ADSLLP  
DNLTKGVFGMA GSVGVGISFG ADRIDVNLQ LEL-YPKEAV NGTELMFVNF GDK-AAFSMS  
DNLTKGVFLP NMSGVGISFG IDRIYVMNE LNL-FPSQES NSTRLLICAF DEN-FMHALP  
DGLVARFRGE NIPATGFSIG VSRLLAALQN LGK-LPV-KE KTGPPVVLMM DKEPVARYQK  
DGLVARFRGE NVPATGFSIG ISRLITALQN LSK-LPV-KK TPGPVVLLMM DREPVAQYQK  
DGLVSRFMGQ PVPATGFSIG VSRMLTALKN LGK-LGQ-VK PLAPVLITVM DGDVMGRYQR  
DGLVSRFMGQ PVPATGFSIG VSRMLTALKN LGK-LGA-EQ VTAPVVVVM DRDIMGRYQR  
DGLVSRFRGE PVPATGFSIG VSRMLTALKN LGK-LDV-SD TVGPVVVLM DKDTLGRYQK  
DGLVSRFRGE PVPATGFSIG VSRMLTALKN LGK-LDN-AD VIAPVVVLM DKDTLGRYQK  
DGLVSRFRGE PVPATGFSIG VSRQAALTL LGK-LDT-RP EFGPVVTVF DRD-VADYQK  
DGLVGMFAGR DIPATGVSIG IERIDAGLE LGV-YSLDVK TVAQVAVVL DRRYRYAYE  
DGLVSRFRGE PVPATGFSIG VSRMLTALKN LGKLDVSDTV GPVVVMDK DTQNLSTRYQK  
DGLVSRFRGE PVPATGFSIG VSRQAALTL IGQ- ---LGNK PQAGPVVTV FGGIAGYQK  
DDLKFRFTQ EVPATGVSIG VDRLLAALAE KGR- ---IRTA ERGPVVVVM DRDRMADYQA  
EGLVEQMGPP AIPATGWAGG IERLAMLDS VPE- ---LPGIALVPM GDEAVLKAAS  
DGLSLEAGLN LTPAIGWAAG IERLAMLDE PKE- ---DAMNVAIPL GEEAKNPAIS  
DNLVSSVGGK HTPAIGFAGG IERIMELINY SPK- ---EERPIYIPI GREAEKHALT  
DNLVSSVGGK YTPAIGFAGG IERIMELINY SMK- ---GDRPICLVPI GREAEHALT  
DGLVKSMMGGH STPAIGFAAG VERLSALIDY EHK- ---KPKRIVLPI GDDTASYAIK  
DKLVASMMGG DVPVAVFAGG VERLASLAAY SHS- ---TRFSVAFPL GEEAACAMR  
DDLVARFTGN VTPATGFSIG VSRLLAALRA AGR-EPG-GA ARGPVVVITF DQA-MGEYFS  
DGLVGMFAGR DIPATGVSIG IERIDAGLE LGV-YSLDVK TVAQVAVVL DRR- YRYAYE  
DHLIGLFAGR NIPTVGLAFG IDRLHVMIE LNL-GPR-PQ TTLAFVTLF GAE-VAESLR  
ENLANHYTQS KLPVGVGISIG LTRLFWQLRD AGV-MDGIAE SSVQAMVLM DE- LDDALD  
ENLASHYTKS KLPVGVGISIG LTRLFWQLRE AGL- IAGIAE SSVHAMVALM DES- LDDALD  
DNLQAQNTYEN VLPVGMVMSIG ITRLFFVLE IGF- IENYNS SLNEKYLIVP IGD-FEYCTK  
DNLAEHYTQ KLPVGVGISIG LTRLISRLK AGI- LNTLPP TPAQVVVVM QDE-MPTYLK  
EELVGTFIGE KMPGVGISIG LTRLISRLK TAG- AHANRV SPAAVLAVM NEE- RPAANR  
DNLASQGNRK -YPGVGLSIG LSRVSYMLH TAG- AHANRV SPAAVLAVM NEE- RPAANR  
ENLAGQFIRR SLPGVGISIG LTRIFAKLVS EGR- ITGGRF CPTDVLVLP SDE- RSAALA  
DNLAGLYTKQ HLPVGVGISIG LDRLLAALAE LGR- LSG-VS KPCAVFVPPF DKG-RDDYLK

DHLTALYMKD AVSGVGASIG LDRLYAAFQQ LGMSREHVCF VQA----LIF CQDSMDVYQK  
DNLVSSFSNQ KISGVGGSFG VDRIKDIIDL EKFSYIKIFV TKARSKVLIV NLDSONYQYE  
DNLIEVFGGK PTPATGFAIG IERLIPILEA KGL--IPEVQ IAPDYYVVP I GER--KQVAIR  
DNLIIETFGGE PTPAVGFAYG FDRIMNIDD LDI----- EESISLIIPV KDKKIKKSLI  
E--LSSLFGGP VTPSTGFAIG FDRVCEACS EAG----- -EKSVMVAVS FKG--EQAFR  
N--LVETFGGE RVESTGFAYG FDRMLNMG GM DEE-----NM RMVDVFIPI QDS--VPEAIR  
DRLLSTYGGD DFPACGFGG DAVIVELLKE KDL--LPELG QEVENIVCAL DKD--QGAAT  
DNLASLMSGE SVPVGFSGM DAVISLILKR ENVQIPREKK SVYICRVGKI NSS---IMNE  
DNLAKLFSEQ DIPAVGFGMG DAVISLILKS KGVKAPHAKK SVYICRVGTV KAER---IAS  
DDLIERFGGQ PTPAVGFAYG HATLNLLEEN AGVLPDDEFI PDDYVLQVGD TDA---EAAD  
DNLIGLFSKE QLSGIGFGLG DVTLKNFLEG HNL--IPNLS REKTIPLPIM DES--FVDTFK  
DGLVGMFDPK KVPVGLSIG VERIFSVIEQ RLEALEEKIR TTETQVLVAS AQKLEERLK  
DGLVGMFDPH KVPVGLSIG VERIFSVIEQ RMKTKGKVR TTETQVVFAT PQKNLQERLK  
DRLVAQFDPH SVPVGLSIG VERIFSVIEQ KMKISCEKVR TTETQVVFAT PQKNLQERLK  
DNLVGMFDPK AVPCVGSIG VERIFSVLEA RAAASGLKLR TSDVEVYVAS AHKGHEQRLK  
DKLVGMFSNK QVPVGSIG IERVFIMEQ QEKEKNQVIR ATETEVLVSI LGK--LILAAE  
DNLNMFSET QIPCVGISFG VERIFSLIKQ RINSSTTIKP TATQVFMVF GGGKLEPERMK  
DNLVGMYGKK QIPCVGISFG IDRIFTILKA RGE--NDIKK REVDVFMVF GGGKLEVERMK  
DNLNTELVGE STPCVGSFG VSRIFSLIYE EYD-----K ESSTMVYVGA SGG--LDERLS  
DNLIIAGFRGM SYPTVGSIFG LDVIYALSQ KET-----IS STADVFIPL GTEL--QCLQ  
DYLVEELGGP PTPALGFALG VERLMLLPD EEE----- KEEVYVPIF GDVH--EYALR  
DYLVEEVGGP KTPAMGFGLG LERLLILDE EGIEIPEPVR CEVYIGSMGD RAR--LEAMK  
NGLVQEGGG EMPGIFGMS IERLIMALK ENIELPIEHS IDCYVVALGE KAKD--HAAK  
DGLVEQIGGG EAPGIFGMS IERLAAIDA EKRELPVOKG IDCYVTLGE KAKD--YSVS  
DGLVEQLGGR ATPAVGFAMG LERLLVLQA VNPEFKADPV VDIYLVASGA DTQS--AAMA  
DGLVAELGGP VTPAVGWAMG LERLIIILQQ MAT--PPAPS PDLYLISKGE KAFP--QALI  
DGLIRMGQGS QTPVGVMAAG VERLSMLMAA DRV-----G APPRPLAMIPA GPDDEVALK  
DMLSRIMGNY DVHAIGFAAG IERIALMREY KIS----- VIKPVFVLP I GKNNICYALD  
DGLAKIMGND DVPAIGFAAG IERIALMREY NIS----- EVKPVFVLP I GKNNICYALE  
DKLLKIYKG DLPAVGFALG VERLMLALQ QSK---GEMW KPRRVLVRYK EEEER--RRAEY  
DELIGNFGE MLPAVGLAVQ VNQIKVALQE QQE---PYE RKRIDIMIH Y ELNRLAEAEY  
NKLGHFDS-- PAPATGFGLR IDRLIEALHM KDE----- -PCEIDAVIF SKEQRAQAI  
DNLKSIYK-- EYPATGGAVY LERLLILPK NVE----- -KKDYFVDK TKKR--LGLK  
DRLLDVYDPA QGPGIFGSCN IENLQVLLA ANRLPHRPA IDQLVIVPDS EAYG--AALA  
ALPGG-----LPGAGFAIG LERLAAMVPA GVP-----S EPETVLALDF AAAT-----  
DDIGADFR-- ARPATGFSTL KLSLVTLQA RLD----- QAVSGIWAPE EGAG--LWQ  
DGLGGYFGR-- ARPATGFSTL LRSFIRGLPA IER----- -QPVLVDAE DAEA---AHE  
PGDLNVTVE--PCCGATLY MDAVLDMVVR PAP----- APRVVLVSTL ARTT-----  
DTAAVTLRA--FAADNLD LGAVLQKFEA RADAIAQAGI EMKDIYDAS FGRPLDYTG  
PQASQVLGD--FAARAKLK LGALSAFDK RVAALANAGV DLETVTYGAA FGRP-----  
PAALHRFAG--KARLK IDDALALFDA RVAALARAGA DPGLMRYRAA FGRP-----  
DGAARALET--FAAGALGS LGAALEKFAA RAKAIEAHGL PAEKIRYDAA FGRP-----  
DAALSAIAA--LAGPKAEA LNAVLDGWRA RLAGMAQRGV ALERATLAAA FGRA--YYDG  
EALARRMPA--LEPSVAR FGRRLAALAA RGI----- AVERLFPDAS HGQS-----

LAESLRQSGI FSEVYEAQK IKKPFYSYANH KGHEFVAVIG EEEFKSETLS LKNMHSQM--  
VAERLRTLI KSEVYEAQK PKRSLAYANS KGHPYVAVIG EDELKQGVVT LKDMQWGDQ--  
LIQLREQGL RTELYPEPAK IKKQMSYANA ANIPYVALVG ENERAAGQVN LKNMLTGEQQ--  
MLAKVRAAGI RAEIFPDAK MKKQMSYANA KSVPFVAVIG ENEMNEGKAM LKNMETGEQN--  
MVTKLRAQGI NTELVPDPVK IKKQLSYADD KIPFALLIG EDEMNGLYS LKNLISGEQF--  
MMQRLRSAGI PAELYL GASG MKAQMKYADR RQAPCVVIQG SQERESGTIQ IKDLVEGARV--  
MMQRLKAGI RAELYL GASG IKAQMKYADR RQAPCVVIQG SQERQDRKIQ IKDLIEGTRI--  
FTQALRAEIG RAEMYQGNK FGNQLKYADR LGSPIAIIQG GDERAEVWQ IKDLIEGKRV--  
FVQDLRHAGI RAEMYQGNK FGDQLKYADR RGSPIAIIQG GDERASGVVQ IKDLIEGKRV--  
MVSRLRAGI RAEMYVGSIG MKAQMKYADR RAAPCVVIQG SQERAGEVQ IKDLVEGKRI--  
MVSRLRAGI RSEMYLGGAG MKAQMKYADR RGSPIAIIQG GDERAKGELQ IKDLIEGARV--  
MVASLRTAGI RAELYLGNKN MGNQLKYADR RNSPCVVIQG SDEKARGELQ IKDLIEGAKF--  
AARILRRGGL NVRIDLRSAS GQVQRKASR LGIPVLAFFG AKEAEGGFLT LYSAAKGERV--  
MVSRLRAGI RAEMYVGSIG MKAQMKYADR RAAPCVVIQG SQERAGEVQ IKDLVEGKRI--  
MVAELRAGI RAELYLGNPN LQQMKYADK RNSPCVVIQG SDEKQGIQV IKDLILGAQF--  
IARVLRAGI RAEIETGRN MKKRMEVVK SGASHAIVLG DEEIAKNIVQ LRDLSSREQQ--  
ILSKLRHAGI SADMWRGN MKRMRQKANG WGVRYAVILG EEEELARNEAT VRSMVTGEQQ--  
LANELRRNLG YVIEYSGT--LRTRMKKANQ ANAKAALIFG DEELSSKTLK IKNMDTGEQK--  
LANELRRNLG YVIEYNGA--LKNRKKASQ ANAKAALIFG NEELSSKTLK IKNMDTGEQK--  
LAYELRCKGI HVCWNNYRGS LKNELRKAND TD--IVLIFG DEELQSNTVK VKDMKTGDQQ--  
SAYELRGRGI RVLCDGVVEK LKIGLKHADR SGVDLALTLG DEEIAKGEVL CRHMDTLQO--  
VVGQLRAAGI AAEVYLTSG MKPQMKYADR RGAPAVVMLG GDEIAAGTVT IKDLDAGRMQ--  
AARILRRGGL NVRIDLRSAS GQVQRKASR LGIPVLAFFG AKEAEGGFLT LYSAAKGERV--  
LAELRAAGI NTLIALEPGN IGKQFKEADR RGVRFALVLG PDELARGEVQ IKDLQRGEOR--  
IARCLRIGGI NTEVQMEAKK VSKQFYASR AGIRFVVLG DDERARGVVA VKDLTREQQF--  
IARLRRIGGI NTEVQMEPKK VGKQFYASR AGIRFVVLG DDERARGVVA VKDLVREQQF--  
ILNKLVLNKG SAEIYFEEGK LKKKLYYANK LDIKYVILIG EDEVTNKL V IKDMITGEQK--  
VANKLRENEI ISELYLEDAG IGKQFYADK LKIPYVILIG EDELKEEKVS VKNMETGNEQ--  
VSQQLRQAGL NVITNFKEKQ LGKQFQAADK QGIRFCVITG ADEAAAQKSS LKDLQSGEQV--  
IANQLRARGI ATDVAPTAAK LGKQIKYADK LGIPYVWFFA TAAEGAE GDE VKNVITGEOV--  
VAAQLRERGF NTEVYHQAQK IGKQIYAVK KDIPVWFFP--FDDGRP--HE VKNLATGEQV--  
LASQLRDAGI GVEVYEPKPK LGQQLKYADS QGFAVAIAG GNEWEAGAVQ VKTLATKESV--  
LCS---VQ--V ATEVFP--RK LSQQYFAEK KGIRWGFVFE QRNAVVDLV LRDLSTRKDT--  
LATRFVRKNI SCEVYFKNKN IKEQIEYALS KEIRFLVFGV QEE--YKEMK VRDLTKKEEL--  
IATSLRKSIG KTEIELMGRK LKAMDYANK VGKKTIIIG EKDLERGVVT VRDMESGEQN--  
IADKLKAGK IVELEIMGRK LRKALDYANS RGFKKVIVG EKELNEGKVT VKDMITGEQK--  
VASMLRERGF TAVVDVGRN LKQMSFASG MGKRYAVILG PDEVKSGRVA IKNLETQEQV--  
ITQELRAAGV SADLEVSGRK LRKALSHADN LGARFVLTG EREIQDGKVT VKDMERNSEQE--  
VATALRDKGQ TVDLVLESKP LKWVFKRAR VNRRLVIVG KTEWEDGSVS VKVLSGSEQF--  
YSRKLREGRM NVTVEIMERG LSAQLKYASA IGADFAVIFG ERDLERGVVT IRNMYTGSQE--  
ISKMLRSGSF IVSAEIMDRS LSSQLKYASV EGCEYAVIAG ERDLNNSVT VRDLSTGEQE--  
VASALRERGN RVDTDITGRS FGAQMNAYDN VGADTVIVG EQDLADGNVT IKNMSAGEQT--  
LSKELRENEI LTEMDSAK IGKQIQAIEK KGYRYVFLG ESEIRTETVQ IKDLISGEQK--  
LVSELWDAGI KAEILYKPK LNLQLYCEE AGIPLVAVIG EQELKDGVIK LRSVTSREEV--  
LIAELWDSGI KAEMLYKNPK LLTQLHYCES TGIPLVAVIG EQELKEGVK IRSVASREEV--  
LIAELWDSGI KAEMLYKNPK LLTQLHYCES EDIPLMVIIG EQEQNEGVK LRSVASREEV--  
VLNLWDAGV KAEHSYKLPK LLVQLQHEE HQIPLVAVIG DAELAQGLVK LREVTTRREE--  
LVNELW--AGI KAEFLK--R--VNHIKIYATQ TGIPLMVLVGE ESELROGKVK LKDIRANQEE--  
VTQLWDAGI EAEYVYKAAN PRKQFADA EK AGCHIAVILG KEEYLEGLR VKRLQGFPAE--  
IARQLW--AGI RAEYMAKA--K PKLQAFKFAA EGTPLVILG EEEELKAGQVR LKLLDQOQGN--  
VLRILQDANI CSEFYTRSS FESQKQYVAK KKIPIVWVG ESEIAAGSVQ VINALTRKKE--  
IAQQLRTTSL KIELELAGRK LRKALYANK ENIPYVILIG EEEICTETVM LRNMKEGSEV--  
VADILRKGK VVEYSYRGGG LKQLEFADK LGVYAVIIG EDEVKNOEVT IKDMETGEOR--  
LAFNLRSKSI KAEIDHLGKS VKAQMKYANK IGAKYTFVIG DSEIEENKIK IKRMSDGEQV--  
VAFDLRAGL AVEKDYLRK MKAQFASDR LKAKFVAVLG EDELKGIIN LKDMATGEQE--  
LVYKLRAGI SSEIDYENK MKGQFADK LGARVAVLG ESEVANGTAV VKDLRSGEQT--  
LAERLRLPGV KLMTNHGGGN FKKQFARADK WGARVAVLG ESEVANGTAV VKDLRSGEQT--  
LAQKLRNQL AVALDSASA FGKQFRADK SGATACLVIG DGEIATGTVQ LKWLADKAQE--  
LAHALRQGL FVDGFSG--N LGKRMKRANR INARAAIILG GEERANGTV VRDLDSGEQE--  
IVDKLRQNI VSIIDPIG--K IAKRIQRVNL EDAKFIIFIG DEERMNNLK FKDLNQEKEY--

IVDKLRTENI AIIIESLG-K IAKRMQRIFN ENAQFIIFIG DEEQANNLK IKDLKKAEE-  
KANVLRKEGN VVEMYTFK-- ---RCENIDL KSFDEVVDVG E-----  
LRNLQKDGK KVALSLFS-N LNDTFQFARK NQIVTVVEAK SESLVEYVMK EKWVVQKEG-  
YANEERMKN KVLQDLS-- -IENIDQMTK SFANVTYFIG ARKEEQNG--  
LADVLEKKG KVGMEIVKRG LEHSLIYAFD KGFKEVLLVE DEIVKVYT-T PKDY-----V  
EAQRLQQDQL RVELYLDSTRR PEVVOQAFQR RRGIRIVWVS SGSAPQSE--  
---AARAAGL GAELAWTG-D EAELRHYAQA RGLRRWVQGA ELRDVTPA--  
AVQRLRRDGG RVVQALPG-- --QDAASARE AGCDRQLALR DGNWQVAP-- ---LAS---  
AVEALREQGQ CVVIDYGIHN VSEELAGRLK KTDGVMQVVK R-----  
-----RRAL QADGWTV-A LTAEAGAAEA RRLGCGHVD DEGRPVAV--  
LVYEIRDASN RQDGLAG-- -----GG RYDRLLTMLG ACEAIPGV--  
-LDYYT--GL VFEVVEAG-- -SDSVLAGGG RYDRLLTLLG AQEKIPAV--  
-LDYYT--GL VFEIGVEG-- -TPAVLAGGG RYDRLLTLLG AREHIPAV--  
-LDYYT--GV VFEIAAQG-- -GERPLAGGG RYDRLLTLLG AKTAIPGV--  
YLFETRSASL GDERPVAADG LPAKLG VATD TGAVGFMRP ARAYAGGG--  
-SLEYD-DGF VFSFHAAD-- AGLPPVSTGG RYDALTAVLG QGRSIPAI--

-LNCLSFLKA LEIIGEN  
-KPCISIEAA AEILLG-  
MLPADAATIV AAIV---  
LVSVEELIAA LRN---  
KVTTFDEVVHK LI-----  
TVDEEQVKT VQDILAA  
TVDEERLVQA VQDILIS  
SVPPEALVAK VREILEH  
SVPGEELVAK VRQILAE  
TVREDGLVDA VREILDA  
TVAESELVAE VVKILAA  
SCAEADLVAK VREVLAR  
AVPLGEAVKA VERLLPS  
TVREDGLVDA VREILDA  
SCNEDEMAK VQELLQR  
EVARADLVAK VREILAE  
EVPVADLARI LSAGRA-  
AIALDQIVDR ILSELRN  
IIARDNTIEN IY-----  
IIAYGNIMEN IHQTLV  
NVAVCDLND LHRIV-  
TVSISNLGDY VSGMESN  
TIPRDQLVDA VRKIIGG  
AVPLGEAVKA VERLLPS  
SLPRAAAISL LAEALSE  
EIPREELAST LQVELEQ  
DVARDELAST LQVELEQ  
KLNIEEI---  
SMSLEEAIKI IKNA---  
EVALADLAE IKRRLT-  
AADCTSWEPT TVVAQQT  
EADPASWNG-  
AYSHESPDAL IEAIQAA  
RLPAHEVRRR MAEAG--  
LLSFEESINL IKCNEKL  
EVKIDIVVF MKNALKT  
LIGIDELTNF  
VVAEEELFSI LQ-----  
TLPRDEMVDK IKGRC--  
QVKLSDLE--  
NVGLDSVVEH LISQAT-  
IVTLGDLVPF LEKSTSY  
TAPIAAPGA HDAPRVE  
SLPRKGLSDT LKKDFQL  
DVRREDLVEE IKRRTGQ  
AIKRENFVAE IQKRLSE  
TVNRESLVAE IQKRLSE  
NVKLEDLAAE IRRRQQA  
EVPRKDFVEV LKQRLSN  
LVSAAIVPI VQEKLSQ  
LVPIDDLADE VKKLL-  
IVKVEQVMSY LLDPENQ  
KVPLSLSNY L-----  
RVKLSLSEL---  
SLDINEIVNI VK-----  
EVALDVFASY VAEKLI-  
EVALDEFIHV MKANQKG  
AVAQDSVAAH LRTLLG-  
TLQLQDLMGN ITELKQR  
TIGLAVLEEF LARFL--  
IIDFEKLEL LKQ----  
IVDFAKALEL LKK----  
-----  
--ETSCVTFK LR-----  
-----  
VMKIREFLDL IE-----  
AVAVAERATT TC-----  
DLKIATEVNA  
-----  
-----  
-----  
SIWLDRLQAL AGEKQ--  
SLWLDRIKAV RGSDKP-  
SLWLDRIEQA IAAGRAE  
SVWLDRIEAL REAAP--  
-----  
GVTRPGLVAR LKGLA--

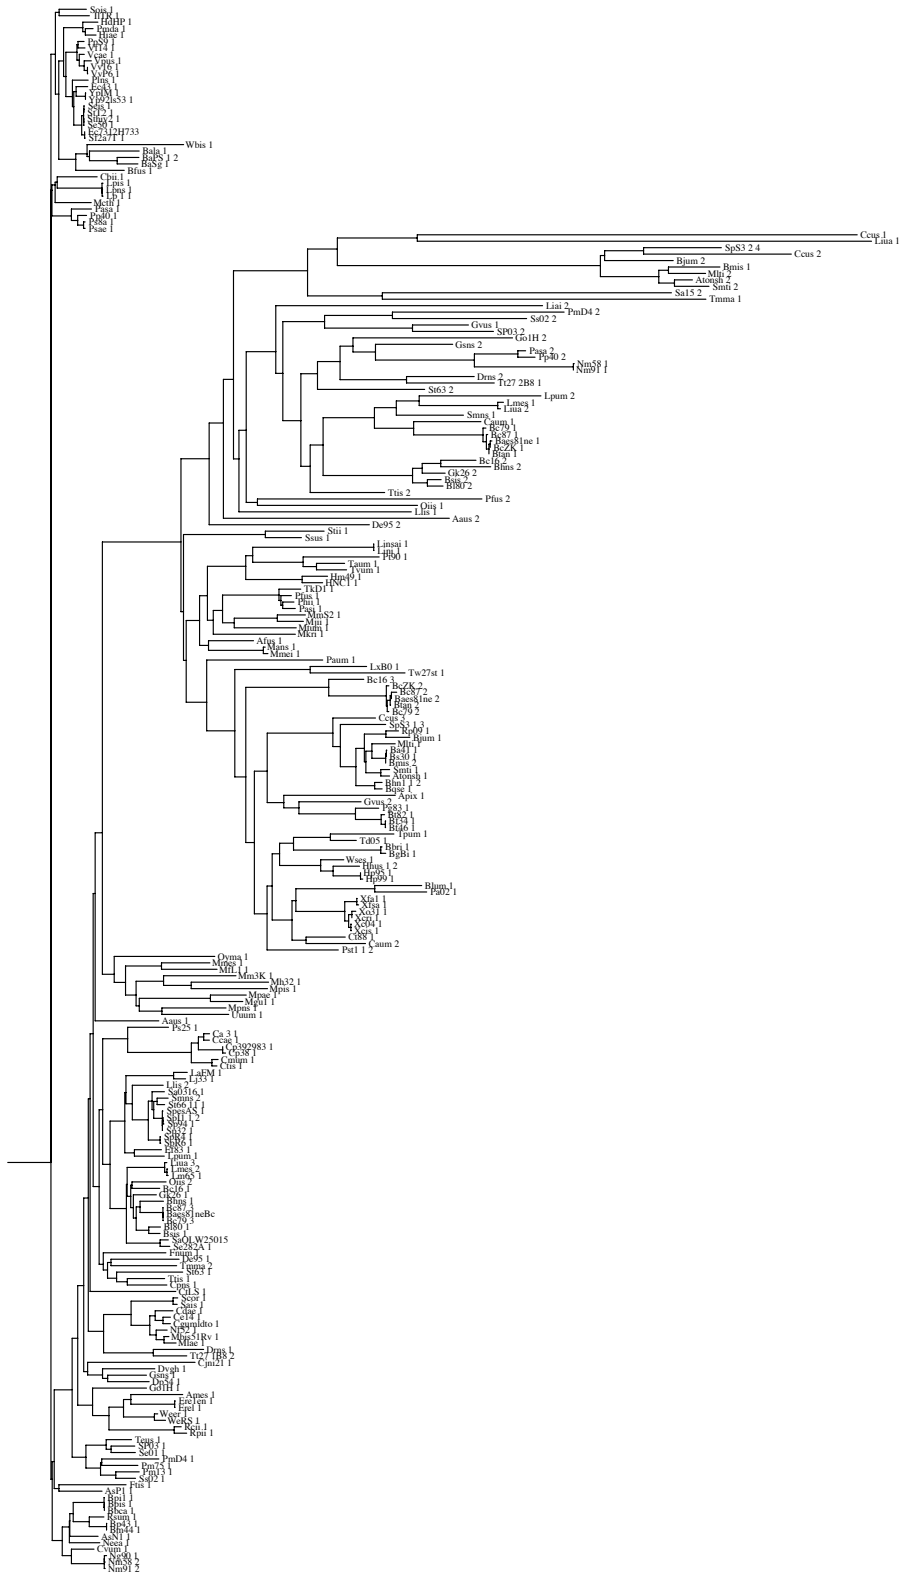

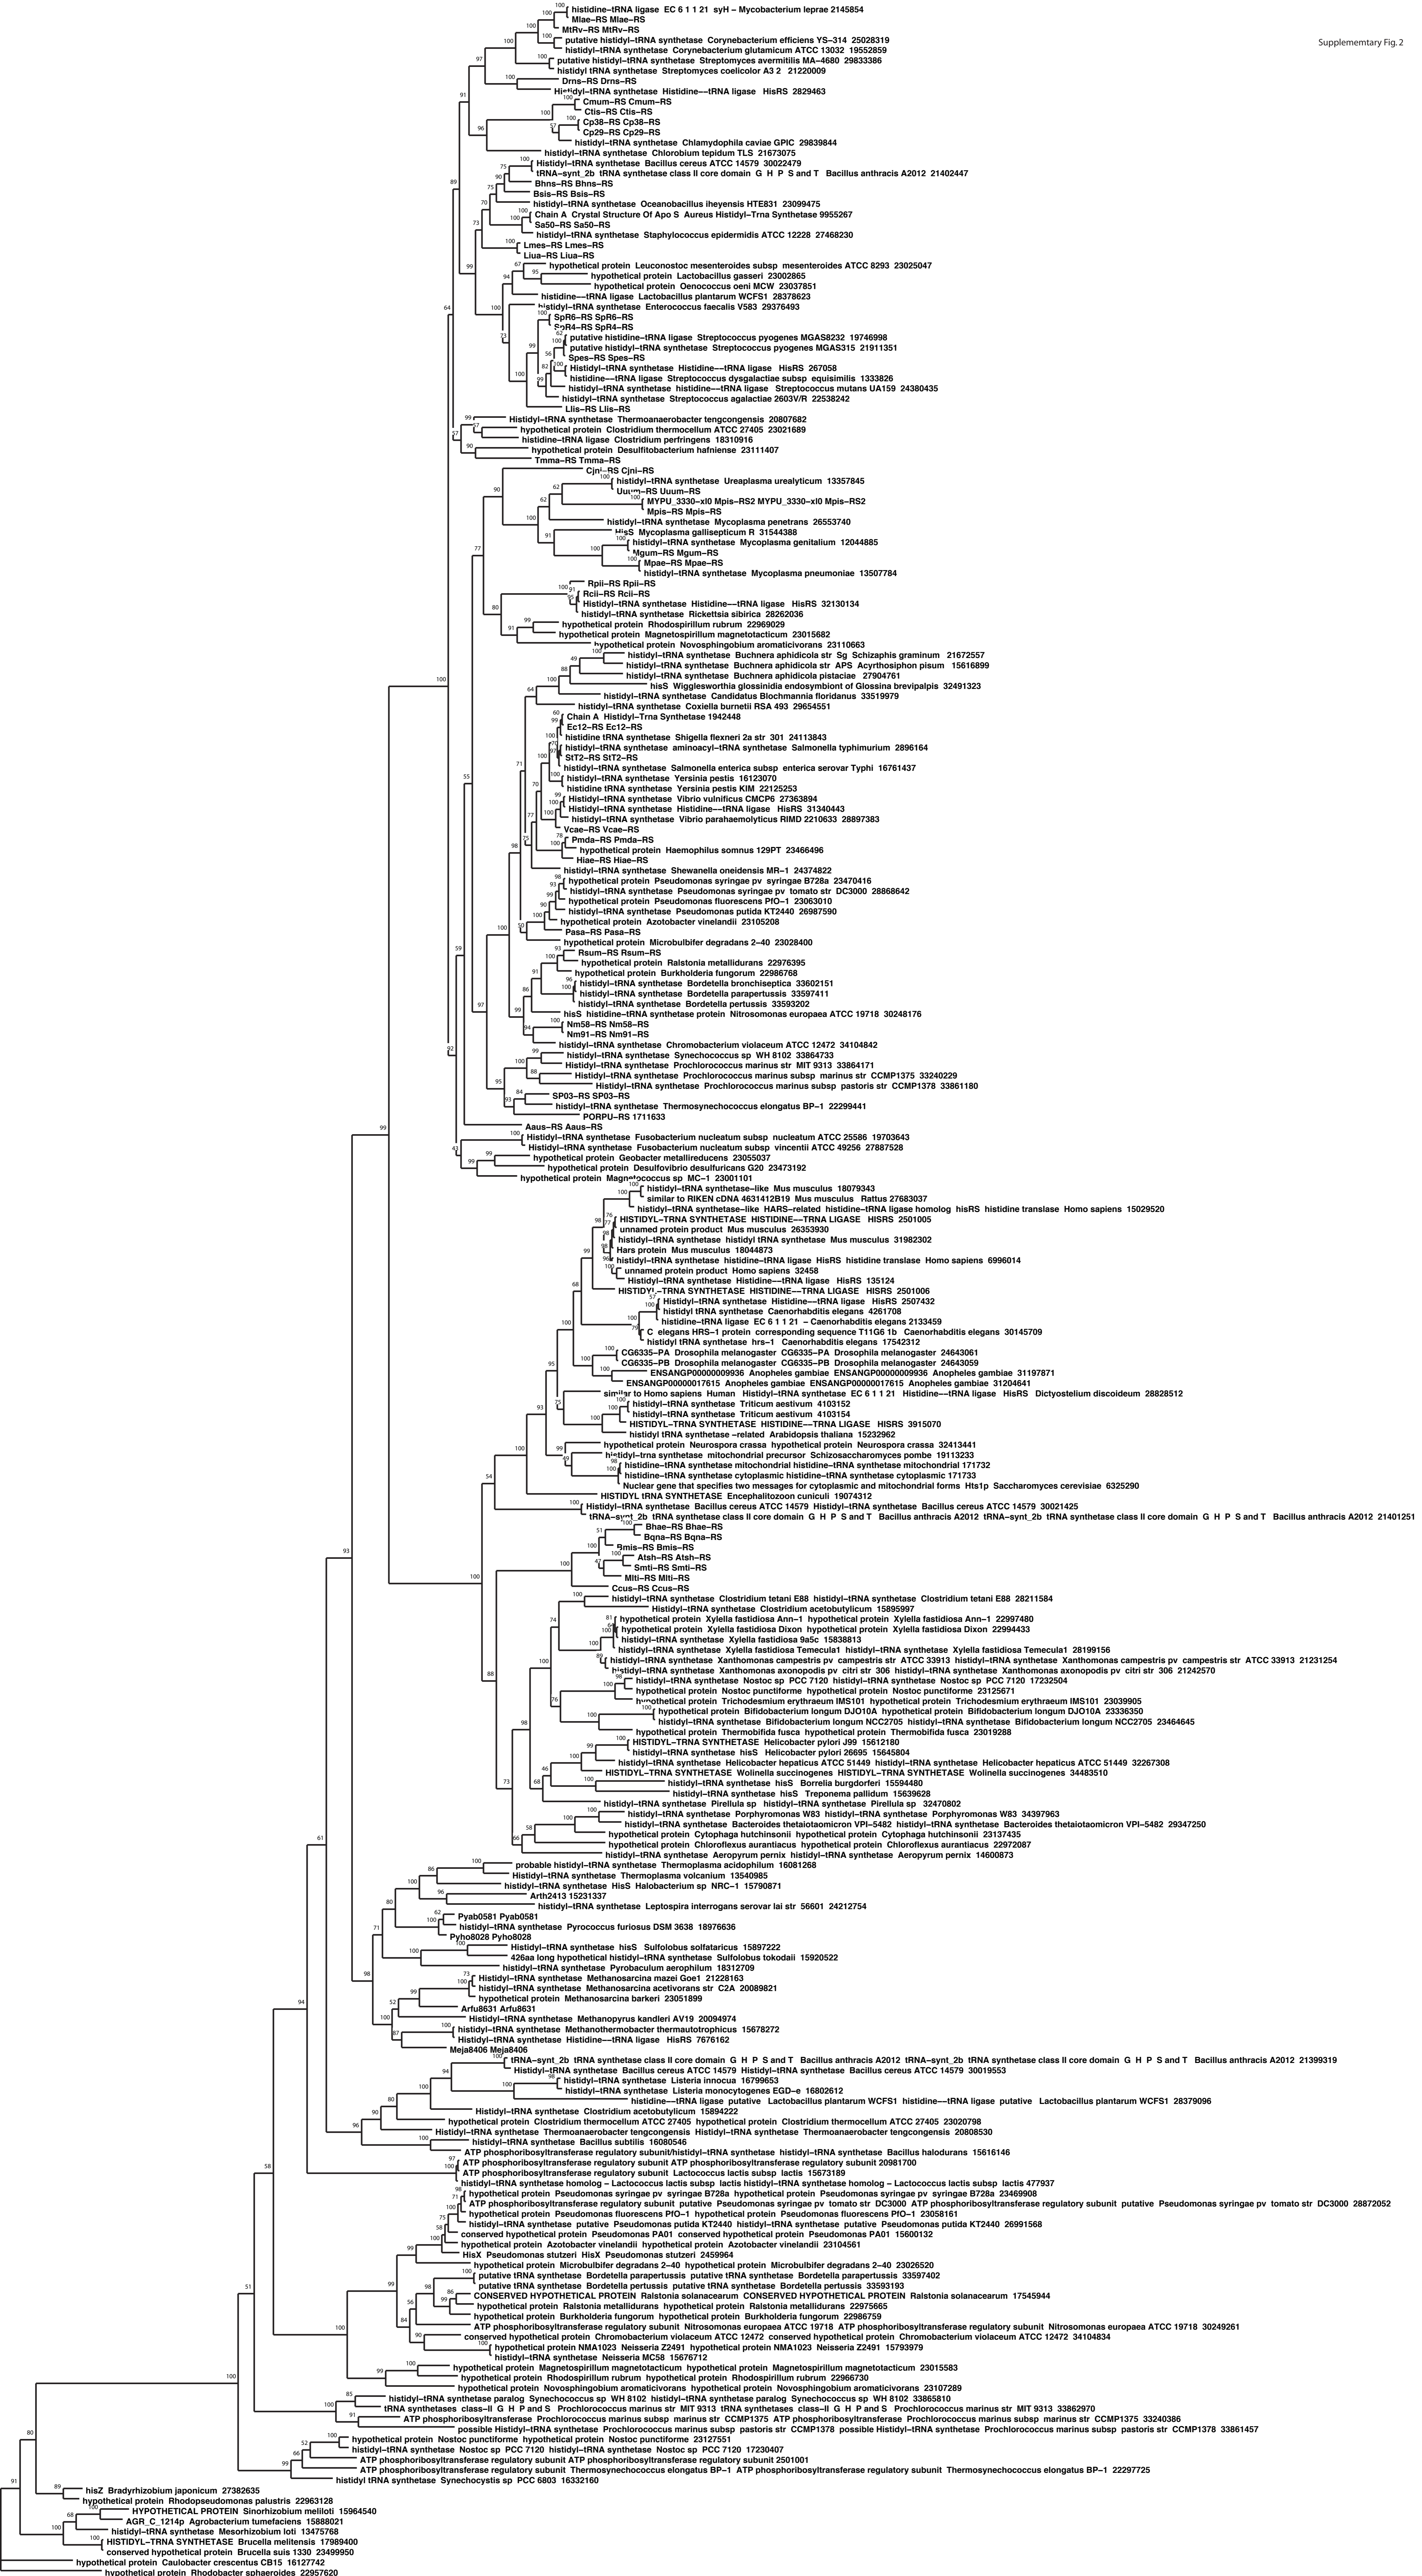

Supplement: nar_34_3_893__1.pdf [file nar_34_3_893__1.pdf]
